# Supplementary material for: Adolescent Binge Alcohol Enhances Early Alzheimer’s Disease Pathology in Adulthood Through Proinflammatory Neuroimmune Activation
Source: Frontiers journal article supplement (doi:10.3389/fphar.2022.884170), 2022-04-26

# Full Western Blot Gels

# Figure 2 Whole Western Blots

## 2A – Female Hippocampus A $\beta$ 1-42

Gel A

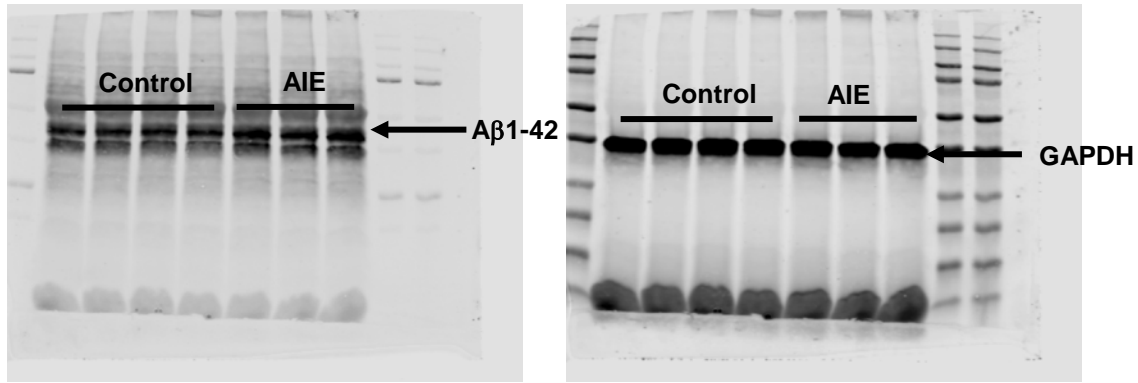

Gel B

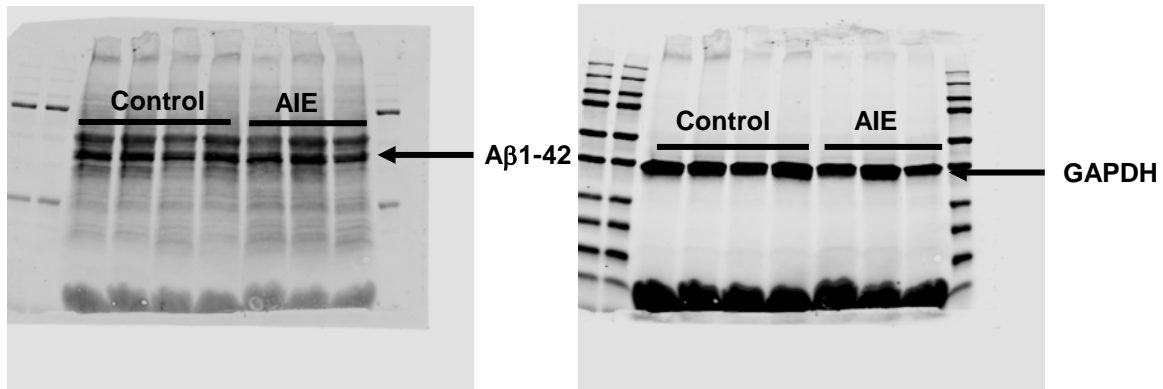

# Figure 3 Whole Western Blots

## 3A – Female Hippocampus p-Tau-181

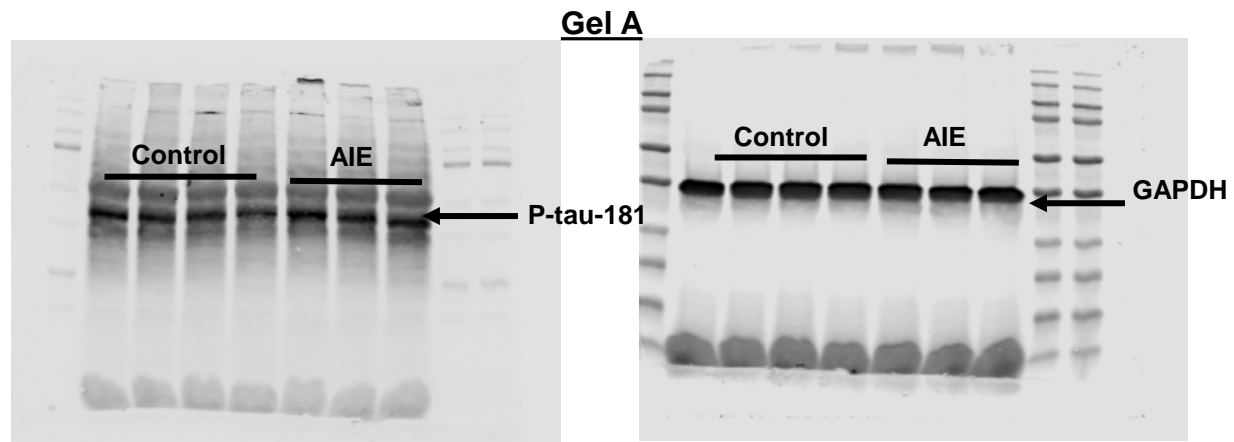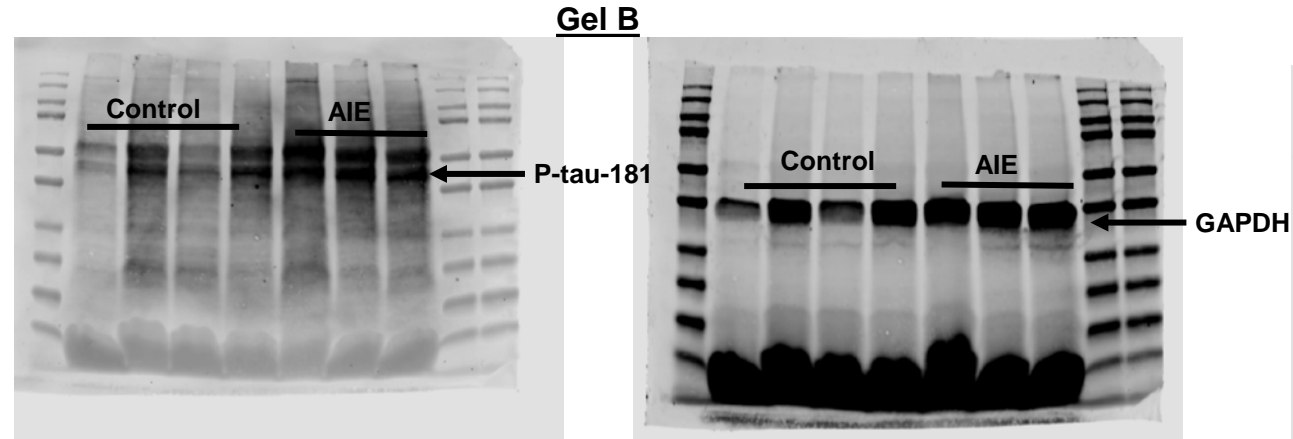

## 3D – Female Cortex p-Tau-181

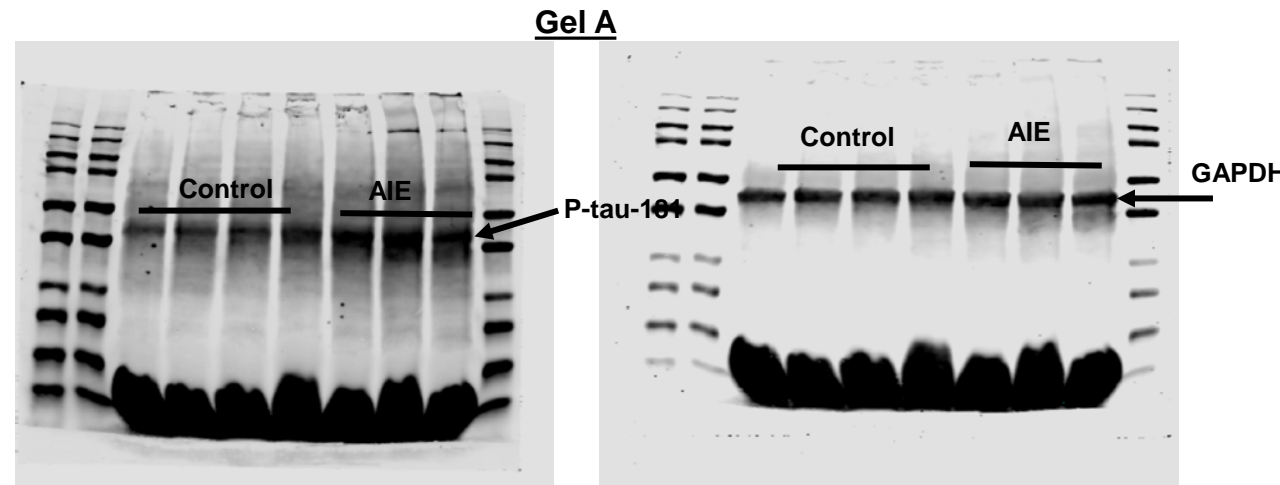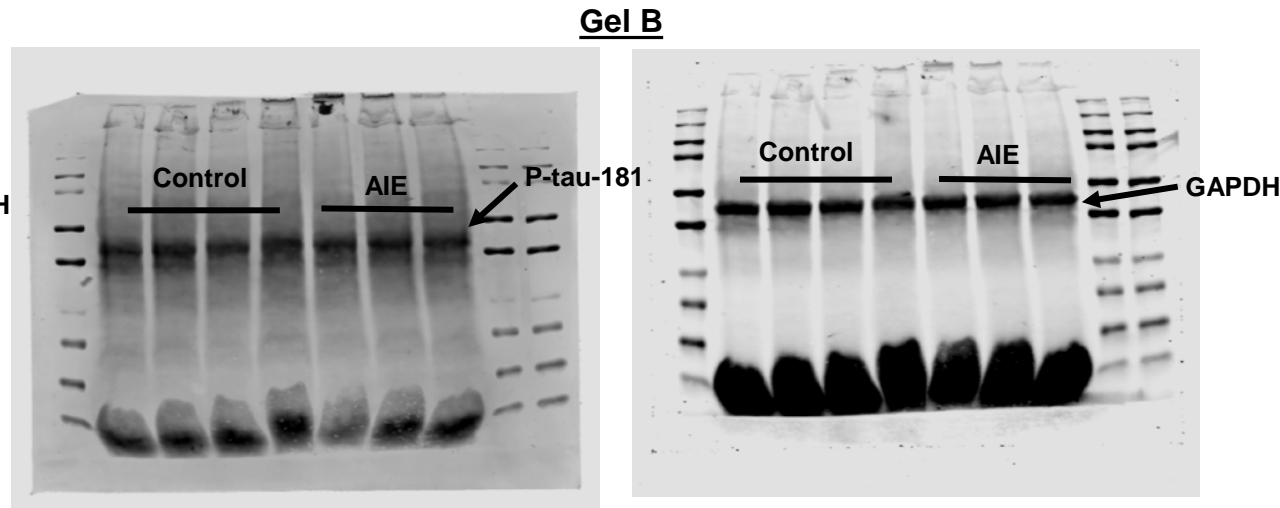

# Supplemental Figure 1 Whole Western Blots

## 1A: Female Cortex A $\beta$ 1-42

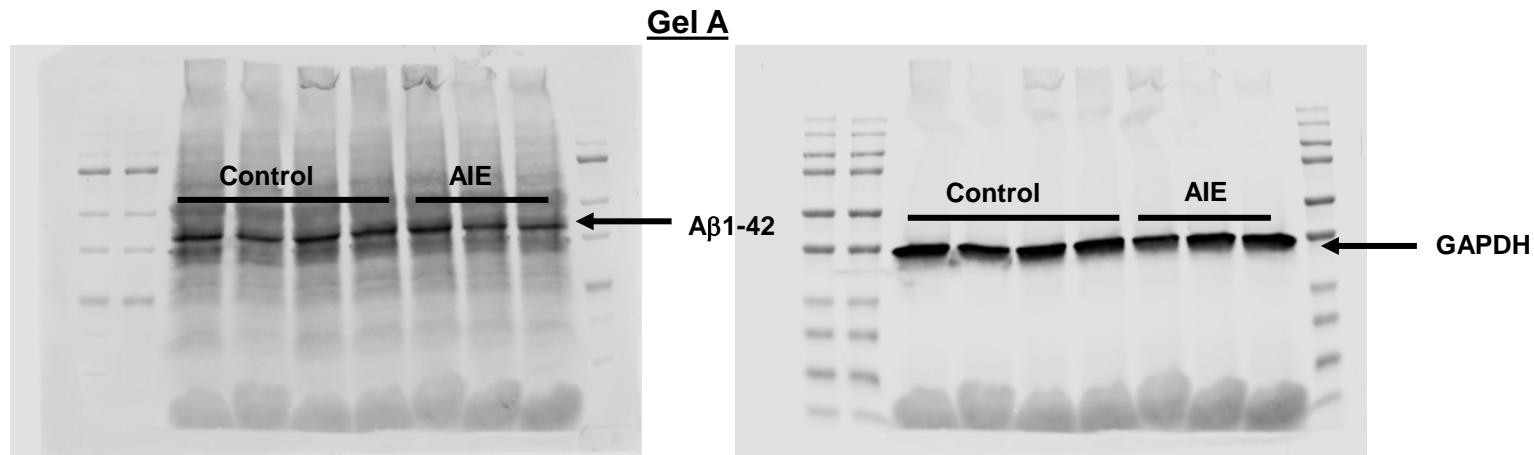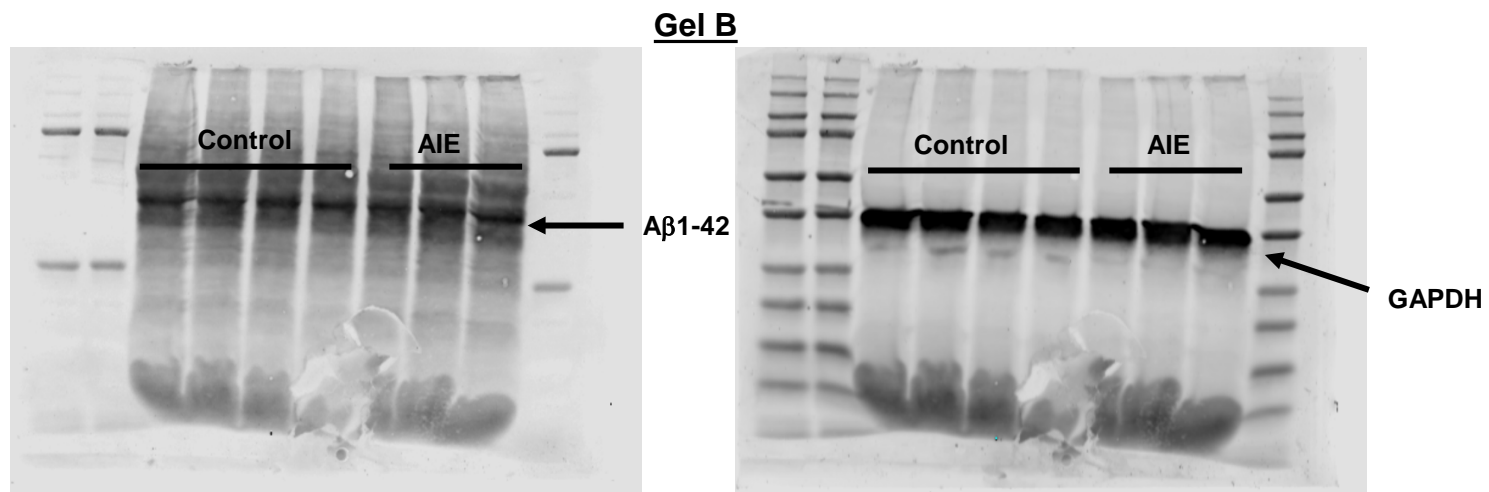

# Supplemental Figure 2

## 2B – Male Hippocampus A $\beta$ 1-42

Gel A

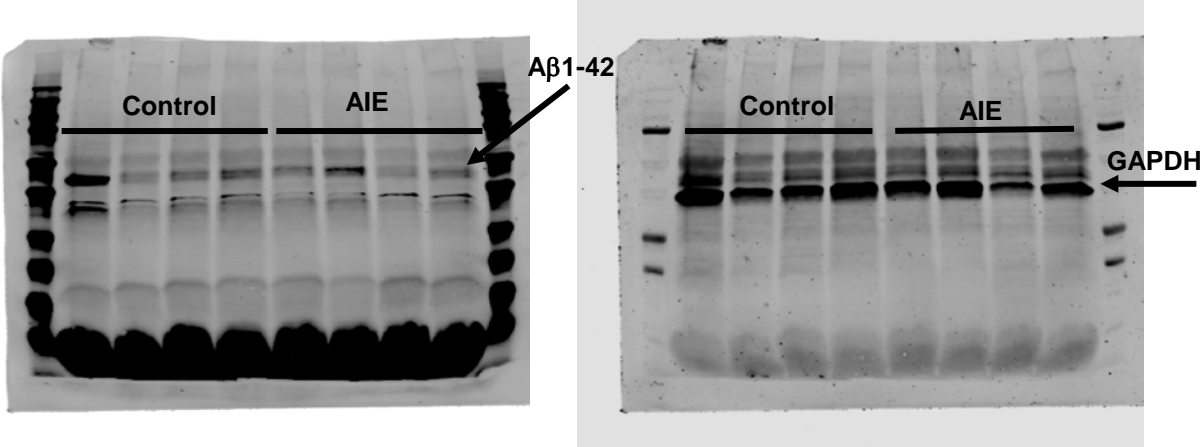

Gel B

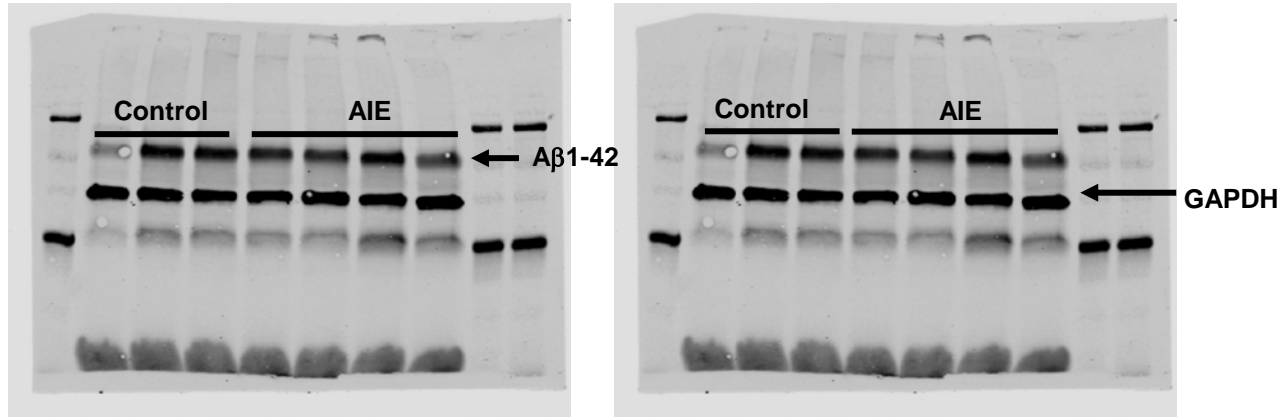

## 2C – Male Cortex A $\beta$ 1-42

Gel A

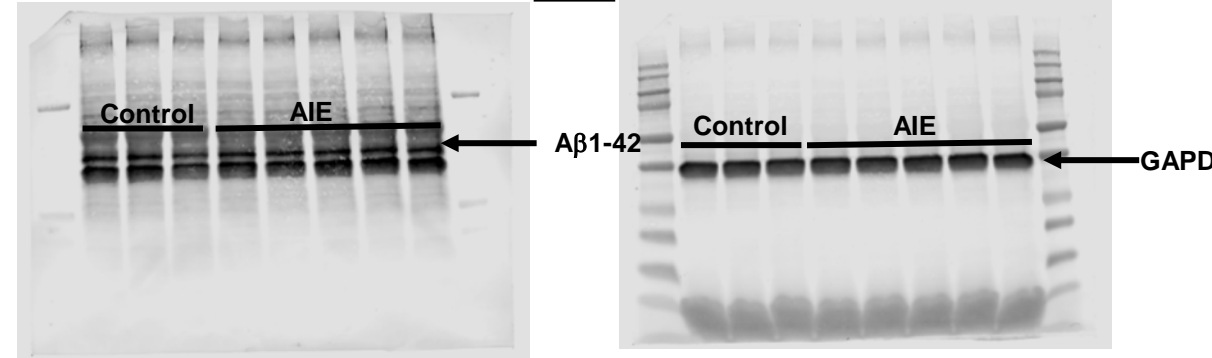

Gel B

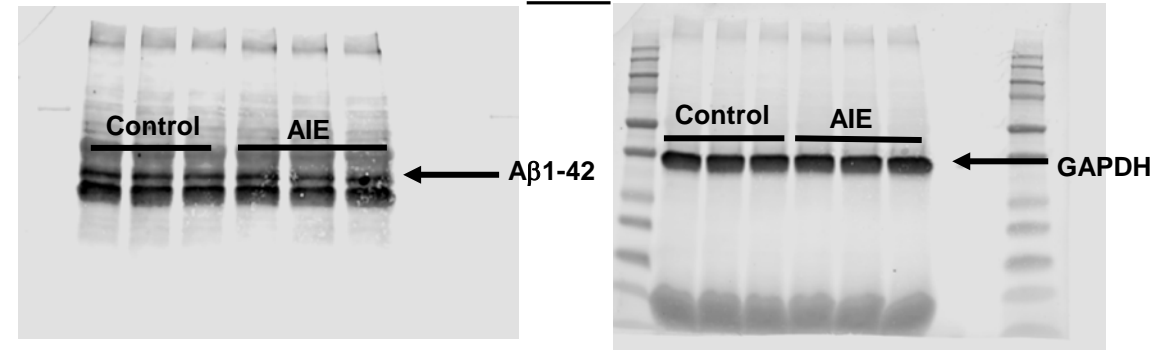

# Supplemental Figure 2

## 2F – Male Hippocampus p-Tau-181

Gel A

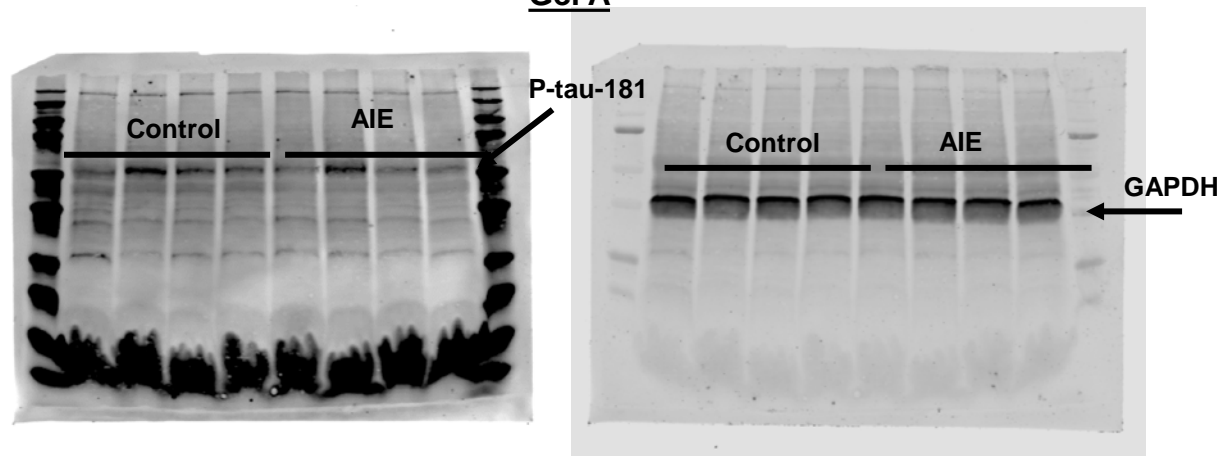

Gel B

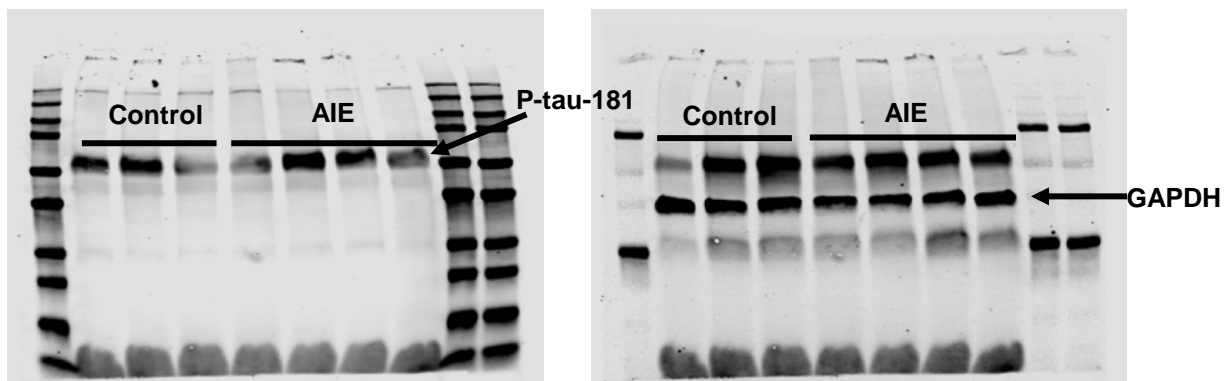

## 2G – Male Cortex p-Tau-181

Gel A

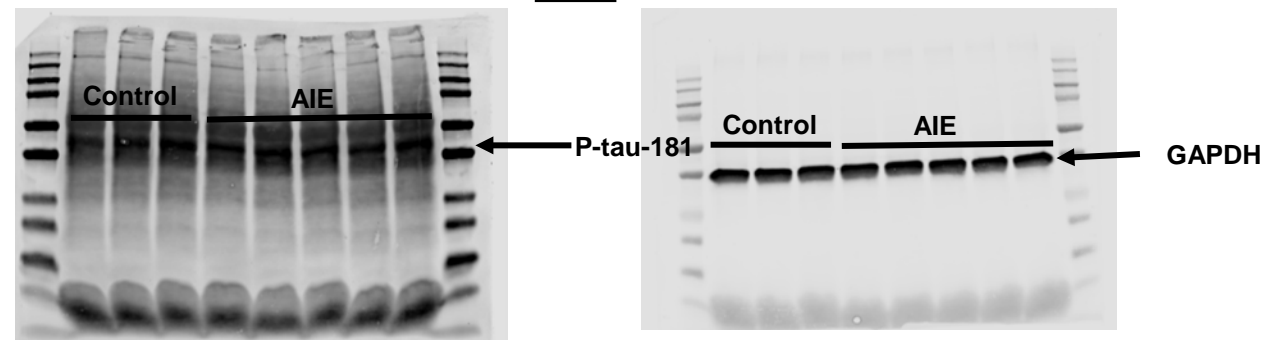

Gel B

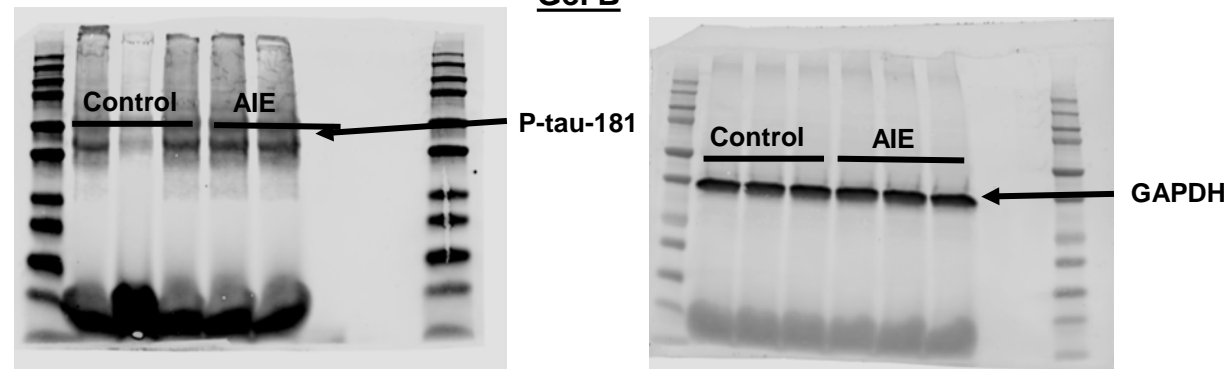

Supplement: Data_Sheet_1.zip [file Full Western Blot Gels Revised.pdf › Full Western Blot Gels Revised.pdf]
