# Supplementary material for: Adolescent Binge Alcohol Enhances Early Alzheimer’s Disease Pathology in Adulthood Through Proinflammatory Neuroimmune Activation
Source: Frontiers journal article supplement (doi:10.3389/fphar.2022.884170), 2022-04-26
Supplement: Data_Sheet_1.zip [file Barnett et al_Additional Data_all data points REVISED.xlsx]

## Sheet: Figure 2
		Figure 2A: APP mRNA				Figure 2B: Abeta1-42 WB
		in female hippocampus				in female hippocampus
		Control	AIE			Control	AIE
		70.7	88.23			79.209	123.089
		76.18	66.05			83.463	120.375
		135	81.6			81.3555	139.16
		107.44	83.82			104.153	167.715
		89.49	68.02			137.328	100.921
		121.18	103.43			114.491	202.124
			87.68
		Figure 2D: Intraneuronal Abeta1-42				Figure 2F: Intraneuronal Abeta1-42
		IHC in female subiculum				IHC in female ENT Cx
		Control	AIE			Control	AIE
		13.0104	37.2107			43.82	77.35
		4.23587	60.1461			44.79	78.11
		1.67628	43.6598			57.97	62.26
		5.18262	22.4644			60.04	109.73
		8.95233				55.59
		Figure 2F: Intraneuronal Abeta1-42
		IHC in female Amygdala
		Control	AIE
		40.8412	107.411
		57.9792	88.281
		55.1616	78.7715
		44.3248	106.509

## Sheet: Figure 3
		Figure 3A: p-Tau-181 WB			Figure 3C: p-Tau-181
		in female hippocampus			in female CA1 (IHC)
		Control	AIE		Control	AIE
		71.5991	119.045		103.163	206.228
		76.1437	126.491		57.9649	196.697
		74.6118	205.881		96.1328	224.597
		75.3907	203.247		115.03	234.767
		152.257	131.121
		149.997	296.116
		Figure 3D: p-Tau-181 WB			Figure 3F: p-Tau-181 IHC
		in female cortex			in female ENT Cx
		Control	AIE		Control	AIE
		93.6553	107.135		101.196	273.587
		87.2394	107.23		176.592	325.039
		108.373	107.387		244.201	232.733
		107.424	109.995		198.623	284.14
		108.577	113.283		202.083
		91.5278	105.663
		100

## Sheet: Figure 4
		Figure 4A Proinflammatory Genes in 3xTg-AD Hippocampus at P200 after AIE or water control
		GENE	Control Males						AIE Males								Control Females						AIE Females
			C1M	C2M	C3M	C4M	C5M	C6M	AIE1M	AIE2M	AIE3M	AIE4M	AIE5M	AIE6M	AIE7M	AIE8M	C1F	C2F	C3F	C4F	C5F	C6F	AIE1F	AIE2F	AIE3F	AIE4F	AIE5F	AIE6F	AIE7F
		IFNα	2.177	0.145	1.462	0.995	1.482	1.467	0.944	1.179	0.679	1.139	0.744	1.225	1.023	1.07	3.69	2.6	0.1	2.45	1.87	0.22	8.58	8.97	10.39	11.74	21.1	16.77	3.37
		IL-6	2.278	0.139	1.572	1.023	1.54	1.277	0.978	1.969	0.691	0.767	0.665	0.995	0.816	0.912	2.42	1.89	0.29	2.34	1.46	0.22	8.37	7.43	9.39	6.16	18.59	10.44	2.24
		IL-1B	2.014	0.192	1.409	1.025	1.366	1.31	0.838	1.333	0.735	1.075	0.688	1.165	0.76	1.021	2.81	2.34	0.27	1.83	1.03	0.3	6.22	6.73	7.84	6.46	12.37	8.77	2.78
		MCP-1	0.912	1.482	1.599	0.754	0.906	0.677	0.915	0.696	0.985	0.866	0.339	1.089	0.305	0.641	1.43	1.86	0.51	1.78	1.24	0.33	4.87	5.33	6.18	6.93	11.73	10.17	1.59
		TNFα	3.389	0.579	1.586	0.506	0.698	0.911	0.75	0.683	0.886	0.859	0.38	0.753	0.727	0.902	0.96	1.33	0.68	1.66	1.1	0.63	2.78	2.83	3.33	4.11	5.8	5.56	1.44
		TLR4	2.421	0.595	1.293	0.688	0.813	0.96	0.497	0.99	0.434	0.329	0.413	0.511	0.5	0.531	1.14	0.75	0.79	1.6	1.37	0.67	2.88	3.5	3.34	1.92	5.61	3.33	1.05
		Figure 4B DAM Genes in 3xTg-AD Female Hippocampus at P200 after AIE or water control
		GENE	Control Females						AIE Females
			C1F	C2F	C3F	C4F	C5F	C6F	AIE1F	AIE2F	AIE3F	AIE4F	AIE5F	AIE6F	AIE7F	AIE8F
		Cst7	0.52	1.16	0.88	0.6	2.07	1.54	4.57	4.92	8.22	4.59	2.24	12.54	4.01	4.9
		C3	0.39	1.7	1.29	0.56	1.51	1.39	3.39	5.05	7.32	4.95	2.35	13.81	3.84	3.14
		TREM2	0.91	1.1	0.607097	0.891929	1.17691	1.56917	1.9	1.62	2.3	2.03	2.53	1.58	2.61	4.1
		Tmem119	0.74	0.84	0.82	1.2	1.39	1.18	1.5	1.95	2.49	1.59	1.14	4.37	1.48	1.56
		TGFβ	0.73	1.16	0.64	0.84	1.64	1.33	1.67	2.23	2.87	1.69	1.11	3.97	1.61	1.84
		CD68	0.86	1.16	0.716357	0.822878	1.34141	1.26466	1.3	1.17	1.45	1.16	1.25	0.94	2.04	1.83
		P2RY12	0.93	0.87	0.97	1.09	1.08	1.08	1.09	0.8	0.96	0.98	1.07	1.17	1.21	1.06
		Lpl	1.06	0.89	0.9	1.08	1.01	1.08	0.85	1.04	0.74	1.05	1.01	0.81	0.96	0.74
		APOE	1.03	1.17	0.76	0.89	1.29	0.96	0.8	1.11	0.6	0.91	1.26	0.83	1.1	0.69
		GRN	1.02	1.26	0.95	1.04	0.74	1.05	0.6	0.71	0.77	0.7	0.59	1.16	0.63	0.59
		B2M	1.08	1.21	0.74	0.79	0.99	1.32	0.52	0.55	0.42	0.72	0.55	0.88	0.43	0.58

## Sheet: Figure 5
			Figure 5A: Open Field Activity					Figure 5B: NORT Activity
			Control	Mino	AIE	AIE+Mino		Control	Mino	AIE	AIE+Mino
			2370	1070	1507	742		1519.83	1470.65	579.911	906.894
			1555	61	144	1027		1001.7	327.911	652.588	1425.46
			3142	1484	744	137		2756.75	1259.61	629.623	958.374
			1800	982	120	3778		2138.32	1051.56	555.19	2995.87
			2176	2954	424	1616		1943.95	1436.59	545.79	1825.03
			1976		1147	1438		1702.14		919.458	1617.64
					1207	1348				1369.37	1848.4
					1223	2650				987.891	1840.3
					628					537.254
			Figure 5C: Center time in NORT					Figure 5D: Time Sniffing Novel Object						Figure 5E: Time Sniffing Familiar Object
			Control	Mino	AIE	AIE+Mino		Control	Mino	AIE	AIE+Mino			Control	Mino	AIE	AIE+Mino
			45.32	1.08	1.52	0.88		20.4	5.48	0	10.88			38.8	8.12	5.96	0.72
			5.64	3.04	0	12.4		4.64	4.44	1.72	13.96			14.24	3.44	7.12	108.64
			47.72	1.2	5.4	57.04		8.12	0	174.08	14.64			3.48	0	26.4	66.16
			20.64	1.96	0	33.8		18.6	2.48	178.92	36.8			59.16	0	23.28	17.44
			26.64	39.56	19.28	23.92		14.08		0	9.4			4.92		6.32	4.28
			8.72		0	21		6.76		24.24	2.04			5.04		26.72	2.6
					8.64	11.96				37.5321	7.24					8.08261	5.64
					3.8	57.48				38.28	30.96					12.8	20.16
					2.68
			Figure 5F: Morris Water Maze Spatial Learning												Figure 5G: MWM Retention Probe Trial
			Learning day	Control											Control	Mino	AIE	AIE+Mino
			1	30.54	20.01	27.18	44.93	19.47	23.34						43.9	39.89	29.82	32.96
			2	7.52	12.61	20.24	26.5	37.27	50.58						47.16	60.51	42.56	44.16
			3	4.88	25.11	4.02	32.1	20.02	9.98						46.43	64.04	30.49	51.9
			4	6.06	5.35	14.87	18.31	17.79	8.94						46.76	68.85	39.36	58.44
			5	4.12	23.43	11.1	18.97	5.57	5.54						57.51	44.36	40.89	43.3
				Mino											58.24		29.95	54.9
			1	11.2	23.52	22.1	32.81	25.68									43.9	41.16
			2	10.17	18.12	9.29	24.7	7.17									47.63
			3	26.24	3.52	6.06	6.88	19.22									43.83
			4	18.59	7.19	9.37	21.62	11.86
			5	5.52	5.19	9.24	4.45	11.42
				EtOH
			1	28.71	33.02	21.32	36.2	22.9	38.39	39.49	22.63	45.98
			2	21.58	16.8	18.09	30.68	20.69	17.91	27.83	33.22	34.44
			3	6.64	23.36	13.49	7.99	8.06	30.63	10.19	39.72	9.56
			4	5.91	9.05	20.48	30.68	5.32	4.39	16.23	11.87	12.94
			5	10	8.46	6.06	15.32	11.87	9.89	7.43	13.68	6
				EtOH+Min
			1	49.18	19.24	31.78	59.96	20.95	13.71	20.86	21.06
			2	15.78	34.71	32.24	46.53	35.7	7.9	26.46	6.54
			3	23.28	18.85	38.02	22.26	17.57	21.5	19.93
			4	10.8	15.11	19.29	9.19	13.43	12.41	28.27	4.47
			5	9.36	19.46	7.31	5.31	5.06	7.44	11.01	5.49
			Figure 5H: MWM Retention Path Crosses
			Control
			Target	3	1	4	6	8	5
			2	2	2	7	4	1	3
			3	0	2	1	1	2	0
			4	1	1	4	5	3	3
			Mino
			Target	4	3	8	8	5
			2	6	0	2	2	5
			3	2	2	0	0	3
			4	0	3	1	1	1
			EtOH
			Target	3	2	4	2	3	2	5	1	4
			2	3	2	4	0	2	3	4	4	4
			3	3	3	3	3	2	1	3	0	4
			4	4	4	4	5	6	2	2	2	3
			EtOH+Min
			Target	4	5	6	6	9	3	2	0
			2	5	4	5	4	2	0	5	4
			3	3	2	2	2	1	1	1	1
			4	1	3	4	1	0	2	1	1

## Sheet: Figure 6
					Figure 6A. Minocycline and AIE effect on Ab1-42
					Control	Mino	AIE	AIE+Mino
					86.6344	71.0341	222.157	89.7888
					25.9025	19.5323	85.3868	61.9094
					44.0553	20.5954	198.222	46.2695
					94.283		241.619	72.6288
					64.2114		270.5	53.8434
							37.032	39.7909
								62.3018
					Figure 6D. Minocycline and AIE effect on ptau181
					Control	Mino	AIE	AIE+Mino
					154.532	78.8454	256.19	110.813
					126.794	62.0281	230.412	184.259
					110.187	92.3612	281.215	133.509
					97.2654		227.405	112.591
					108.567		331.526	116.241
							349.443	124.103
							295.222
							404.809

## Sheet: Supp Figure 1
	Supp Figure 1A: APP mRNA			Supp Figure 1B: Abeta1-42 WB				Supp Figure 1D Proinflammatory Genes in 3xTg-AD Female Cortex at P200 after AIE or water control
	in female cortex			in female cortex				GENE	Control Females							AIE Females
	Control	AIE		Control	AIE				C1F	C2F	C3F	C4F	C5F	C6F	C7F	AIE1F	AIE2F	AIE3F	AIE4F	AIE5F	AIE6F	AIE7	AIE8
	56.6427	116.875		99.3682	127.791			TNFα	0.95	1.11	1.2	1.67	0.94	0.67	0.75	2.65	2.43	1.71	1.18	1.63	2.2	1.28	1.27
	94.9318	98.9631		102.206	85.3392			MCP-1	1.29	1.35	1.07	0.75	0.62	0.97	1.21	1.44	2.39	1.69	1.53	1.67	1.64	1.33	1.41
	65.2913	84.9663		90.9948	85.726			TLR4	1.24	1.07	0.54	1.33	0.83	1.01	1.25	1.53	2.48	1.62	1.65	2.85	2.81	1.16	0.62
	160.766	125.698		116.085	112.106			TLR7	0.61	1.13	0.93	1.47	1.62	0.95	0.69	1.25	1.16	1.29	1.01	0.75	0.74	0.91	3.15
	108.295	99.6515		92.9203	126.525			IFNγ	1	1.2	0.83	1.13	1.81	0.94	0.52	1.01	1.27	1.21	0.7	0.24	1.11	0.51	0.8
	114.073	85.8543		100.505	110.996			IL-6	1.47	0.98	0.63	1.25	0.87	0.96	1.06	1.52	2	1.66	1.29	1.82	0.67	0.92
	89.1906	78.1849		97.9214	122.198			IL-1β	1.57	0.97	0.89	1.68	0.6	0.59	1.24	1.75	1.99	1.58	1.43	1.51	0.75	1.19
								TRAIL	0.75	0.91	1	1.61	1.09	1.34	0.62	1.19	1.27	0.86	1.22	1.07	1.05	1.11	1.4
	Supp Figure 1C: MAPT mRNA							IFNα	1.51	0.85	0.87	1.97	0.53	0.54	1.58	1.41	1.67	1.48	1.22	1.28	0.8	1.09
	in female cortex			Supp Figure 1F: MAPT Gene Expression
	Control	AIE		in female hippocampus				Supp Figure 1D Proinflammatory Genes in 3xTg-AD Male Cortex at P200 after AIE or water control
	93.2934	102.09		Control	AIE			GENE	Control Males						AIE Males
	65.5127	129.67		74.7376	114.527				C1M	C2M	C3M	C4M	C5M	C6M	AIE1M	AIE2M	AIE3M	AIE4M	AIE5M	AIE6M	AIE7M
	60.4933	100.685		80.5332	81.5661			TNFα	0.8	1.38	0.98	0.85		1.09	1.31	1.59	0.93	1.52	2.27	0.67	1.67
	141.897	93.6173			99.7733			MCP-1	1.31	1.05	0.42	1.24	1.32	1.06	3.13	1.12	0.73	1.49	2.23	1.21	3.95
	103.157	101.034		106.158	95.943			TLR4	1.78	0.85	1.21	0.71	0.51	1.52	1.82	1.13	1.58	1.03	1.2	1.54	1.44
	135.646	63.0622		123.543	86.3814			TLR7	1.27	0.98	1.18	0.71	0.81	1.19	0.9	0.8	0.74	0.77	0.89	0.86	0.99
	142.39	78.9957		100.579	104.492			IFNγ	0.2	1.81	1.74	0.5	3.1	1.04	1.05	0.53	1.08	1.29	1.05	1.08	1.77
				114.449	96.0668			IL-6	1.27	1.04	0.53	1.79	0.8		0.6	0.51	0.89	0.69	0.7	0.58	1.11
								IL-1β	1.04	1.06	0.57	1.91	0.84		0.79	0.59	0.86	0.63	0.76	0.52	1.1
								TRAIL	0.97	0.71	1.05	0.88	0.95	1.66	1.99	1.27	1.14	0.7	0.53	1.17	1.12
								IFNα	0.25	1.39	1.62	0.74	2.22	1.06	0.99	0.7	1.15	0.89	1	0.75	1.44
								Supp Figure 1E DAM Genes in 3xTg-AD Female Cortex at P200 after AIE or water control
								GENE	Control Females							AIE Females
									C1F	C2F	C3F	C4F	C5F	C6F	C7F	AIE1F	AIE2F	AIE3F	AIE4F	AIE5F	AIE6F	AIE7	AIE8
								Cst7	1.89	1.4	0.91	0.61	0.83	1.04	0.79	1.88	2.61	0.85	1.95	2.44	0.44	0.98	1.7
								APOE	0.88	0.65	1.17	1.58	1.21	0.85	0.91	1.12	2.13	0.92	0.81	0.95	0.93	1.54	1.56
								Tmem119	1.15	0.97	0.71	0.8	1.13	1.16	1.2	1.39	1.53	1.15	1.21	1.27	0.61	1.17	1.4
								Lpl	0.88	0.91	1.11	1.1	0.65	1.26	1.24	0.89	1.02	1.1	1.39	1.05	1.49	1.42	1.2
								TREM2	1.09	0.92	1.11	1.27	0.74	1.01	0.95	1.3	1.24	1.09	1.09	1.32	1.3	1.09	1.08
								P2RY12	1.01	1.12	1.37	1.31	0.67	0.81	0.9	1.37	1.16	1.1	1.19	1.33	1.21	1.66	1.23
								Ctsd	0.97	0.93	1.11	1.12	0.89	1	1.01	0.82	1.03	1.04	1.16	0.92	1.39	1.4	1.22
								C1QA	0.68	1.22	0.67	1.18	0.89	0.93	1.82	0.82	1.01	1.25	0.95	1	1.2
								GRN	0.82	0.86	0.94	1.26	0.89	1.15	1.19	0.89	0.92	0.84	0.99	0.86	1.11	1.11	1.02
								B2M	1.27	0.85	1.63	0.77	0.68	1.08		1.13	1.62	1.29	1.13	0.83	0.56	1.03
								CD68	1.22	0.94	1.61	0.97	0.73	0.91	0.84	1.31	1.34	1.26	1.4	1.18	1.17	1.13	1.17
								TGFβ	1.74	0.75	1.34	0.81	0.65	1.08		0.68	0.75	0.86	0.74	1.13	1.21	0.69

## Sheet: Supp FIgure 2
	Supp Figure 2A: APP mRNA				Supp Figure 2B: Abeta1-42 WB
	in male hippocampus				in male hippocampus
	Control	AIE			Control	AIE
	60.71	100.36			86.1435	103.35
	168.19	111.74			107.258	96.7617
	59.26	136.14			100.988	114.587
	123.12	99.66			105.611	113.72
	90.76	95.6			83.755	119.157
	97.95	118.93			116.245	62.5905
		99.66				112.828
		111.35
	Supp Figure 2C: Abeta1-42 WB				Supp Figure 2D: APP mRNA				Supp Figure 2E: Abeta1-42 IHC
	in male cortex				in male cortex				in male ENT Cx
	Control	AIE			Control	AIE			Control	AIE
	118.733	96.3283			85	107			42.4132	32.648
	82.5674	96.6441			76	93			42.723	40.0775
	104.913	104.146			79	118			37.5991	58.6923
	93.7867	125.894			100	148				47.5982
	98.8711	87.2209			138	139
	101.129	90.568			122	94
		102.706				85
		80.9731
	Supp Figure 2F: MAPT mRNA				Supp Figure 2G: p-Tau-181 WB				Supp Figure 2H: p-Tau-181 WB
	in male hippocampus				in male hippocampus				in male cortex
	Control	AIE			Control	AIE			Control	AIE
	136.65	85.59			85.2721	85.1542			106.144	87.5644
	52.69	112.16			114.645	133.309			92.3622	87.9949
	99.69	74.25			96.3325	98.5705			107.646	97.7361
	102.85	96.96			73.8358	106.258			93.8479	88.2499
	109.47	64.19			148.63	53.2117			106.33	121.252
	98.66	100.03			77.5346	156.276			93.6702	100.339
		71.47				94.9102				114.124
		88.92				67.2907				125.041

## Sheet: Supp Figure 3
		Supp Figure 3A. Time Sniffing During Training
		Control	Mino	AIE	AIE+Mino
		104.51	21.2	0.87	86.95
		199.8	15.51	45.55	149.69
		19.63	1.37	176	85.28
		11.81	5.31	69.54	48.16
		12.74	117.34	22.3	59.65
		28.64		1.15	16.84
				206.31	37.08
				63.67	86.35
				203.19
		Supp Figure 3B. MWM Reversal Learning												Supp Figure 3C. MWM Reversal Probe Crosses
		Reversal Day	Control											Control	Mino	AIE	AIE+Mino
		1	534.73	1179.24	990.52	775.71	472.76	730.13						9	2	9	2
		2	403.52	1150.22	490.86	337.88	702.7	863.98						6	8	6	7
		3	282.68	299.54	645.36	501.18	755.14	296.42						9	4	7	4
		4	393.87	163.35	290.58	112.98	833.91	330.59						7	4	5	2
		5	109.21	610	159.37	298.51	189.1	126.6						7	4	3	1
																6	3
			Mino													6	6
		1	1125.34	952.34	1016.05	851.85	830.12									6	6
		2	1067.86	1028.92	866.73	781.66	981.95									3
		3	518.63	340.22	396.25	442.93	594.55
		4	612.5	93.98	177.53	211.19	284.39
		5	323.41	420.36	587.61	612.2	337.09
			EtOH
		1	955.95	1217.07	569.1	1242.61	945.77	829.4	704.19	826.09	563.85
		2	720.31	1133.76	698.64	857.06	625.1	800.04	760.02	444.17	470.96
		3	227.63	451.96	406.75	761.21	945.8	494.95	1196.26	528.59	508.31
		4	319.17	464.98	237.42	611.43	854.22	387.41	323.43	327.88	136.91
		5	103.51	211.28	219.31	282.28	919.16	117.46	187.07	502.8	230.03
		1	EtOH+Min
		2	614.22	1044.31	837.1	771.39	881.56	881.99	1474.27	1098.21
		3	551.81	621.78	568.66	1256.21	752.76	698.67	1272.62	1061.74
		4	203.39	328.71	468.24	739.8	180.82	222.81	961.02	109.85
		5	240.58	277.41	258.1	794.22	262.23	399.2	280.7	777.22
			565.01	135.63	197.35	255	219.64	88.1	157.82	607.08
	Supp Figure 3D. Prepulse Inhibition
	Control							AIE
	74	50.6	18.1	28.8	43.8	17.7	14.7	-47.2	62.2	21	52.7	19	37.5	37.8	23.4	43.6
	78	77.9	31.9	41.7	69.9	37.3	38.9	49.9	84.2	63.7	67.9	56	63.1	51.8	45.4	73.3
	82	79.8	48.2	62.8	75.3	56.6	56.7	54.5	90.9	79.3	70.6	60.6	72.5	66.6	60.8	81.2
	86	86.3	81.4	76.9	87.3	78.5	51.3	64.7	94.6	91.4	84.5	71.3	79.7	74.7	75.9	93.3
	90	88.6	84.4	78.8	93.4	88.6	55	75.8	95.5	90.5	88.2	76.1	90.3	78.5	88.5	94
	Mino							AIE+Mino
	27.5	33.7	-8.1	23.2	41.2			25.8	30.5	37.9	38	23.7	48.3	49.2	53.1
	49.3	41.8	49.2	56.3	74.9			69.9	46.8	74.9	49.6	74.3	69.7	68.5	68.8
	72.9	64.6	62.6	69.6	84.9			81.8	55.6	78.7	31.8	79.9	85.3	81.7	88.8
	84.5	74.8	76	71.1	91			85.8	68.3	86.8	37.1	85.5	87.7	85.1	90.9
	81.5	79	70	77.1	87.5			89.1	79.2	88.3	46.4	88.8	92.1	85.4	93
	Supp Figure 3E. Piezo Sleep Monitoring
	Control							AIE
	Lt1.Day1	57.86	64.66	61.14	60.38	59.41	60.76	53.52	57.98	44.37	55.12	59.36	57.1	63.13	58.4	60.02
	Drk2.Day1	33.12	35.15	34.68	43.62	36.65	33.89	28.53	38.49	28.41	21.17	20.07	41.32	37.27	31.9	20.09
	Lt3.Day2	61.66	66.07	62.37	63.47	62.26	60.55	57.6	59.3	53.83	62.1	67.52	59.44	60.82	59.93	64.92
	Drk4.Day2	28.36	35.13	15.31	40.75	41.9	36.44	18.55	46.91	28.77	50.03	43.71	34.46	10.78	25.22	44.97
	Lt5.Day3	63.63	63.14	69.1	64.28	60.19	64.4	61.22	61.95	57.59	57.81	61.16	61.6	61.14	69.24	58.41
	Drk6.Day3	22.94	35.79	41.56	38.51	21.46	19.75	42.73	19.2	27.75	51.55	42.52	26.92	39.23	20.31	37.03
	Lt7.Day4	67.62	60.85	60.82	67.52	64.89	67.78	60.09	65.25	53.47	56.89	65	64.99	59.51	66.51	61.13
	Drk8.Day4	40.01	34.69	38.01	26	44.04	45.34	41.42	43.02	34.48	45.41	38.25	48.07	39.84	43.28	26.77
	Lt9.Day5	63.88	59.99	64.74	66.47	61.67	64.88	62.98	58.19	55.77	60.68	65.51	63.46	59.87	66.16	70.2
	Drk10.Day5	40.75	29.28	34.69	38.84	45.75	42.71	37.76	44.26	26.96	34.02	39.47	52.16	30.05	39.25	20.37
	Lt11.Day6	60.93	61.48	60.91	65.86	63.23	68.05	63.51	54.63	55.03	62.63	65.78	61.91	62.8	67.23	68.65
	Drk12.Day6	33.48	29.38	14.3	40.93	46.09	41.95	14.02	38.36	32.62	48.92	46.78	45.02	8.84	34.85	30.54
	Drk14-Reb	39.95	40.7	37.53	46.94	45.05	44.6	50.5	40.48	39.33	55.74	46.46	46.49	51.63	45.06	40.06
	Lt15.Day8	58.01	62.45	61.18	57.21	66.7	63.88	56.21	56.44	54.42	54.43	63.74	60.56	58.94	58.04	61.9
	Drk16.Day8	38.63	37.61	34.1	31.75	45.88	45.21	41.5	50.32	26.83	49.18	39.41	42.44	31.79	33.52	14.1
	Lt17.Day9	59.41	63.96	65.01	66.29	67.62	67.59	62.74	57.63	57.96	56.11	64.84	63.22	61.02	60.56	69.06
	Drk18.Day9	40.7	27.88	27.97	43.22	40.93	41.12	38	49.49	22.14	36.36	33.15	41.39	15.25	26.83	27.78
	Mino							AIE+Mino
	58.51	56.28	68.36	59.76	58.58			62.54	54.19	58.66	58.57	61.31	62.74	60.66	60.76
	42.29	36.29	12.52	31.53	39.78			12.74	43.1	42.72	18.31	31.04	10.19	41.79	45.5
	58.51	54.06	64.39	63.58	59.97			64.69	49.94	60.97	63.22	65.38	62.67	58.89	56.2
	43.55	24	33.29	18.81	33.27			35.45	42.16	21.6	41.52	31.42	12.89	17.98	45.56
	62.63	59.98	61.62	66.34	61.66			59.39	56	62.64	58.48	63.54	62.31	60.48	58.36
	39.99	33.81	29.76	38.11	28.13			34.02	46.28	41.18	42.89	17.73	26.51	43.47	42.33
	61.62	63.01	64.92	62.08	66.25			63.78	55.59	58.61	57.8	66.45	65.35	52.18	63.89
	30.93	32.68	36.7	43.6	38.52			31.8	26.2	48.77	29.63	37.95	20.2	46.29	26.51
	66.55	60.12	62.06	62	61.73			61.97	61.5	59.24	68.92	63.71	69.35	57.74	67.02
	38.55	48.45	27.15	39.17	44.07			25.29	45.79	43.78	26.74	42.25	18.49	44.02	49.69
	63.85	57.28	62.71	62.9	59.47			62.94	58.25	62.36	62.81	62.29	60.13	60.72	60.97
	30.67	41.12	36.04	18.66	36.28			34.28	40.09	27.55	45.65	24.02	25.72	26.1	48.19
	48.64	41.95	42.42	42.1	44.27			43.11	54.34	54.5	53.09	48.07	44.89	46.13	43.03
	51.25	54.81	58.17	60.43	59.91			56.25	52.83	56.62	57.5	56.56	58.9	57.89	58.88
	37.69	40.28	20.75	39.69	43.56			30.98	27.47	48.37	32.76	40.69	20.6	44.29	45.15
	60.02	61.66	63.48	63.14	61.75			67.23	63.16	60.24	64.56	60.7	67.98	61.53	62.82
	32.36	33.89	36.11	20.17	37.9			18.86	43.13	43.27	51.92	33.47	17.57	30.17	41.02

## Sheet: Supp FIgure 4
		Supp Fig 4A: Abeta1-42			Supp Fig 4B: ptau181
		Amygdala Controls			Hippocampus Controls
		P200	P270		P200	P270
		40.8412	86.6344		103.163	154.532
		57.9792	25.9025		57.9649	126.794
		55.1616	44.0553		96.1328	110.187
		44.3248	94.283		115.03	97.2654
			64.2114			108.567
